# Supplementary material
Source: PubMed Central journal article supplement (PMC7704808)
Supplement: NIHMS1599666-supplement-1.pdf [file NIHMS1599666-supplement-1.pdf]

**Supplementary Table 1** Abnormal and Normal R-Values

|                                       | Normal R-Value*<br>(N = 329) | Prolonged R-<br>Value* (N = 15) | P Value |
|---------------------------------------|------------------------------|---------------------------------|---------|
| Age, yrs, mean (SD)                   | 54.7 (10.9)                  | 48.3 (14.2)                     | 0.029   |
| Male, %                               | 55                           | 60                              | 0.687   |
| White race, %                         | 90                           | 93                              | 0.565   |
| TEG Indication, %                     |                              |                                 | 0.536   |
| - Anemia                              | 14                           | 7                               |         |
| - Coagulopathy                        | 32                           | 47                              |         |
| - Other                               | 6                            | 0                               |         |
| - Overt Bleeding                      | 40                           | 47                              |         |
| - Pre-procedure                       | 6                            | 0                               |         |
| - Thrombocytopenia                    | 3                            | 0                               |         |
| Cirrhosis etiology, %                 |                              |                                 | 0.774   |
| - Alcohol                             | 53                           | 67                              |         |
| - NASH                                | 25                           | 20                              |         |
| - HCV                                 | 11                           | 7                               |         |
| - Other                               | 11                           | 7                               |         |
| CCI, mean (SD)                        | 6.7 (2.4)                    | 6.3 (2.1)                       | 0.550   |
| PVT, %                                | 7                            | 7                               | 0.998   |
| DVT, %                                | 5                            | 0                               | 0.560   |
| ICU, %                                | 60                           | 73                              | 0.308   |
| Bleeding, %                           | 56                           | 60                              | 0.773   |
| Infection, %                          | 46                           | 67                              | 0.120   |
| ACLF, %                               | 36                           | 60                              | 0.064   |
| Child-Pugh A/B/C, %                   | 1/15/84                      | 0/7/93                          | 0.636   |
| MELD score, mean (SD)                 | 27.5 (10.0)                  | 35.4 (11.8)                     | 0.003   |
| MELD-Na score, mean (SD)              | 28.5 (9.8)                   | 36.2 (11.5)                     | 0.003   |
| INR, mean (SD)                        | 2.4 (1.3)                    | 2.9 (1.3)                       | 0.157   |
| Bilirubin, median (IQR)               | 5.6 (2.5, 11.9)              | 7.4 (4.8, 24.4)                 | 0.123   |
| Creatinine, mean (SD)                 | 2.0 (1.5)                    | 3.6 (2.6)                       | <0.001  |
| Fibrinogen, mean (SD)                 | 150.4 (85.7)                 | 150.0 (55.4)                    | 0.988   |
| Platelets, mean (SD)                  | 95.7 (68.5)                  | 90.2 (55.4)                     | 0.758   |
| Albumin, mean (SD)                    | 2.8 (0.6)                    | 2.8 (0.5)                       | 0.991   |
| Hemoglobin, mean (SD)                 | 8.3 (1.8)                    | 8.9 (1.9)                       | 0.222   |
| WBC, mean (SD)                        | 11.1 (8.1)                   | 17.6 (10.3)                     | 0.003   |
| Antiplatelet, %                       | 10                           | 13                              | 0.618   |
| - Aspirin, %                          | 9                            | 13                              | 0.586   |
| - Clopidogrel, %                      | 2                            | 0                               | 0.630   |
| Heparin (Prophylaxis), %              | 12                           | 7                               | 0.483   |
| Anticoagulation, %                    | 6                            | 13                              | 0.232   |
| - Heparin (Therapeutic), %            | 2                            | 7                               | 0.194   |
| - Warfarin, %                         | 3                            | 0                               | 0.516   |
| - DOAC, %                             | 1                            | 7                               | 0.085   |
| Length of Stay, days, median<br>(IQR) | 11.0 (5.0, 20.0)             | 16.0 (7.0, 28.5)                | 0.448   |
| Inpatient Death, %                    | 28                           | 47                              | 0.125   |
| Discharge to Hospice, %               | 7                            | 13                              | 0.323   |
| 30-Day Readmission, %                 | 26                           | 7                               | 0.098   |
| 30-Day Mortality, %                   | 33                           | 47                              | 0.266   |

\*Normal R-value  $\leq 10$  min; prolonged R-value  $> 10$  min. ACLF = acute-on-chronic liver failure; CCI = Charlson Comorbidity Index; DOAC = direct oral anti-coagulant; DVT = deep vein thrombosis; HCV = hepatitis C virus; ICU = intensive care unit; INR = international normalized ratio; IQR = interquartile range; MELD = Model for end-stage liver disease; Na = sodium; NASH = nonalcoholic steatohepatitis; PVT = portal vein thrombosis; SD = standard deviation; TEG = thromboelastography; WBC = White blood cell count

**Supplementary Table 2** Measures of Hemostasis in Patients Without Transfusions

|                    | No Bleeding (N = 116) | Bleeding (N = 116) | P Value | No Infection (N = 132) | Infection (N = 100) | P Value |
|--------------------|-----------------------|--------------------|---------|------------------------|---------------------|---------|
| <b>R-value</b>     | 4.8 (4.1, 5.7)        | 4.2 (3.6, 5.3)     | 0.013   | 4.3 (3.6, 5.3)         | 4.8 (4.1, 5.8)      | 0.017   |
| <b>K-value</b>     | 2.2 (1.5, 3.8)        | 1.9 (1.4, 2.8)     | 0.03    | 2.0 (1.4, 3.0)         | 2.0 (1.6, 3.0)      | 0.906   |
| <b>Alpha angle</b> | 63.2 (52.4, 69.7)     | 66.5 (60.9, 71.8)  | 0.006   | 65.2 (56.2, 71.4)      | 65.5 (55.6, 69.5)   | 0.707   |
| <b>MA</b>          | 44.8 (35.7, 54.5)     | 51.2 (44.7, 58.2)  | 0.004   | 48.8 (40.0, 56.8)      | 49.0 (41.7, 56.0)   | 0.876   |
| <b>LY30</b>        | 0.0 (0.0, 0.9)        | 0.0 (0.0, 0.6)     | 0.962   | 0.0 (0.0, 0.8)         | 0.0 (0.0, 0.4)      | 0.345   |
| <b>INR</b>         | 2.5 (1.2)             | 2.1 (0.9)          | 0.003   | 2.1 (1.0)              | 2.6 (1.1)           | 0.002   |
| <b>Platelets</b>   | 101.5 (74.7)          | 96.2 (67.7)        | 0.573   | 97.0 (71.5)            | 101.2 (71.0)        | 0.665   |
| <b>Fibrinogen</b>  | 131.5 (92.9)          | 154.9 (76.4)       | 0.209   | 145.9 (87.3)           | 145.1 (79.6)        | 0.966   |

INR = international normalized ratio; LY30 = clot lysis at 30 min; MA = maximum amplitude.
